# Supplementary material
Source: Elsevier journal article supplement (https://api.immotoolbox.com/fiche/it/montecarlo/99519/pdfv3/mmc7.pdf)

## Affitto Monaco

60 000 € / mese

|                      |                    |               |              |
|----------------------|--------------------|---------------|--------------|
| Tipo di proprietà    | Penthouse/Roof     | Num stanze    | 5+           |
| Superficie totale    | 702 m <sup>2</sup> | Num camere    | 5            |
| Superficie abitabile | 366 m <sup>2</sup> | Num parcheggi | 4            |
| Superficie terrazza  | 126 m <sup>2</sup> | Num cantine   | 1            |
| Superficie giardino  | 210 m <sup>2</sup> | Residenza     | Memmo Center |
| Data di liberazione  | 01/06/2024         | Quartiere     | Fontvieille  |

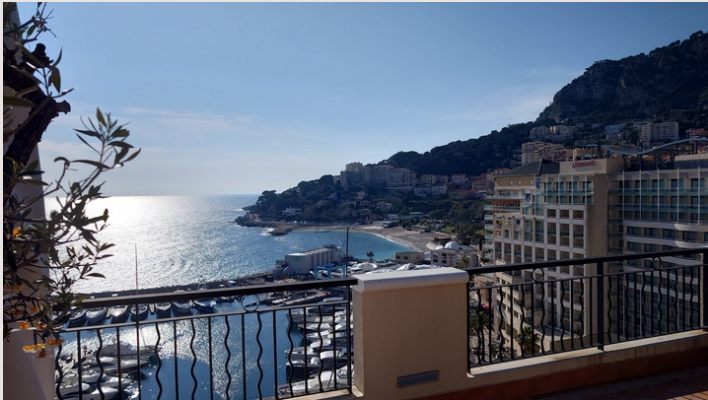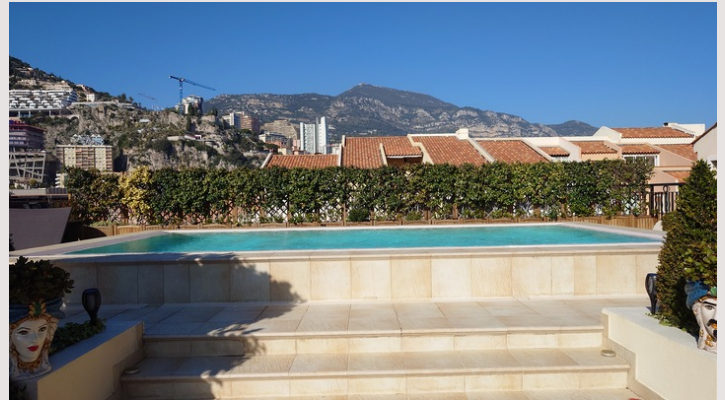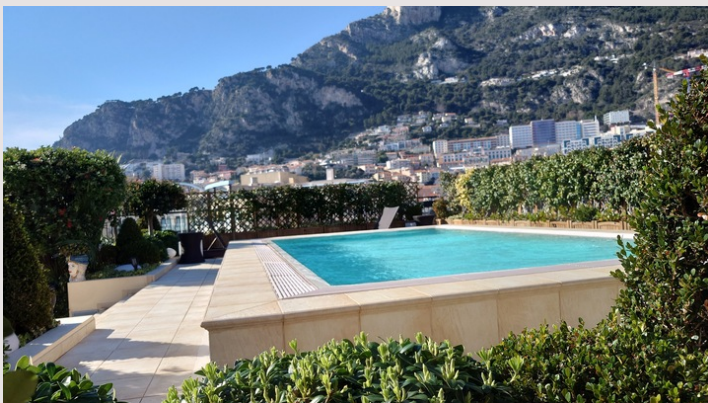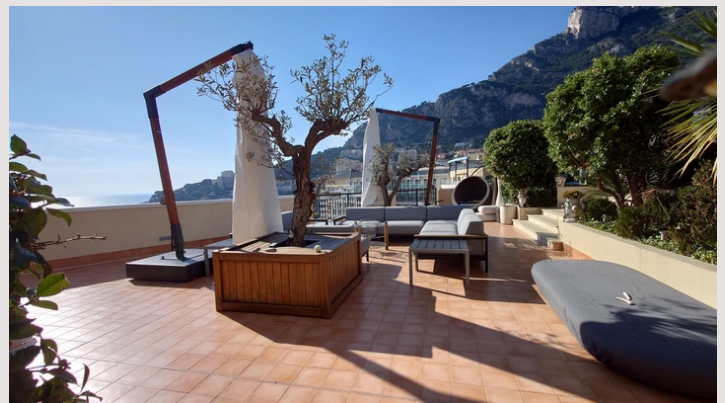

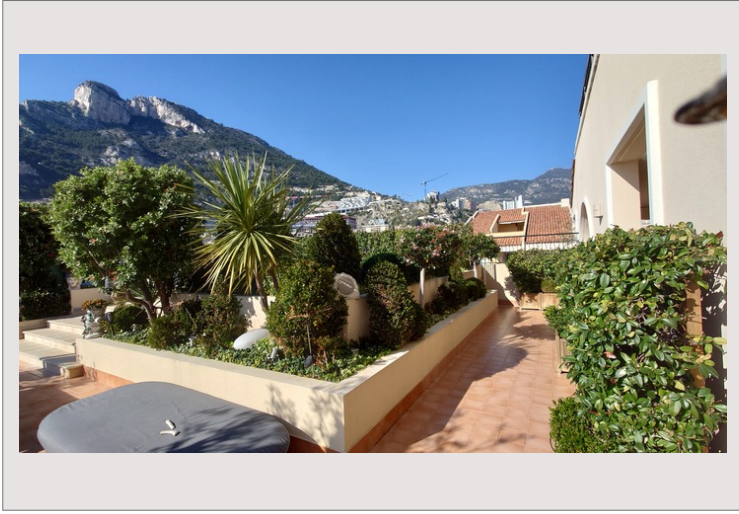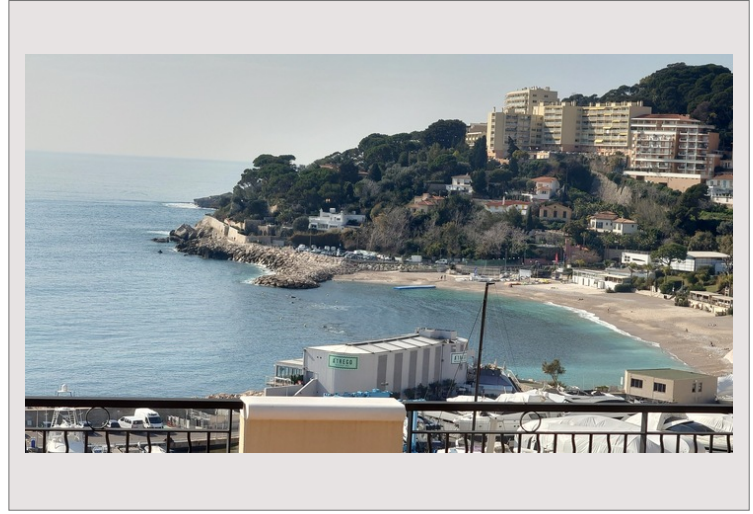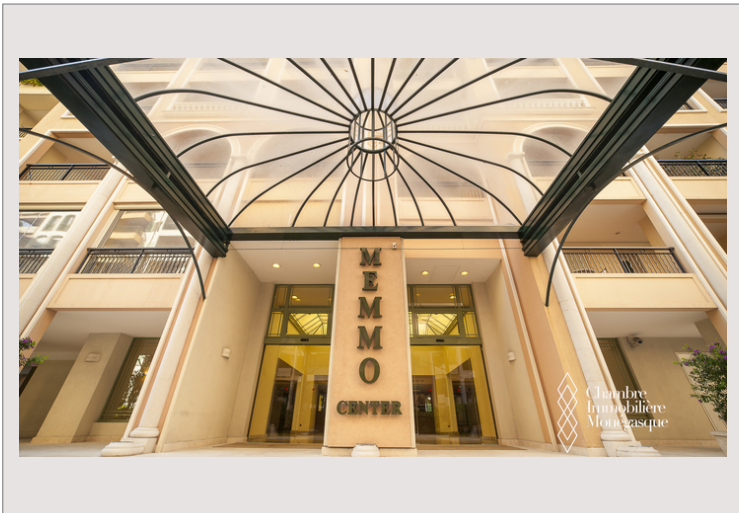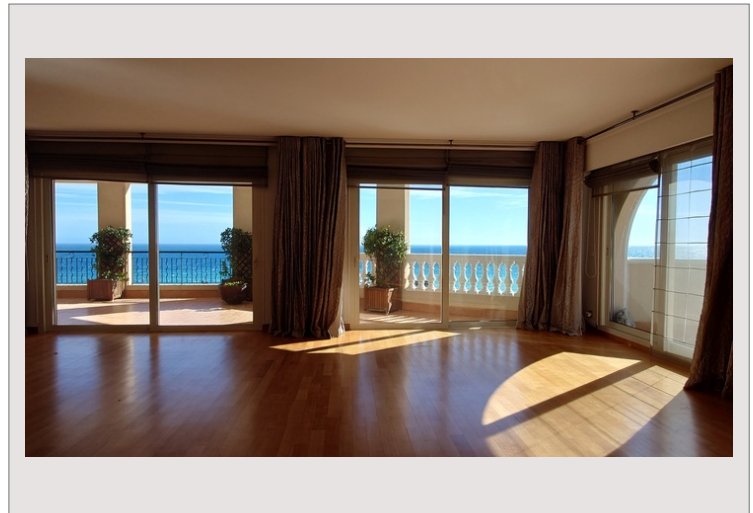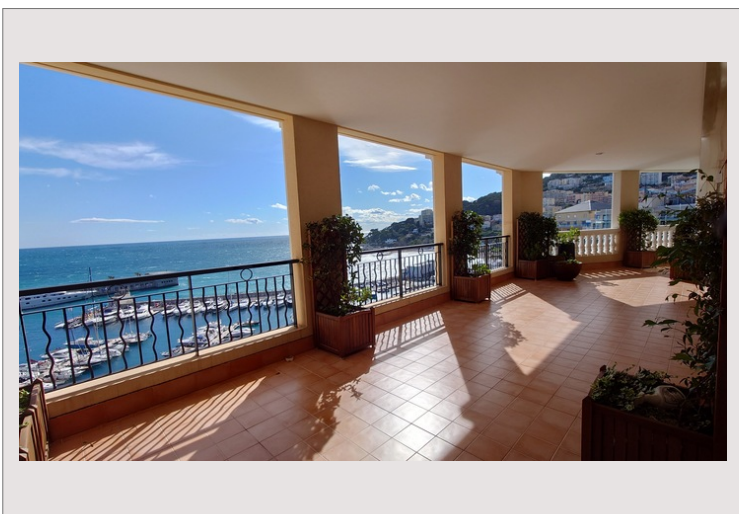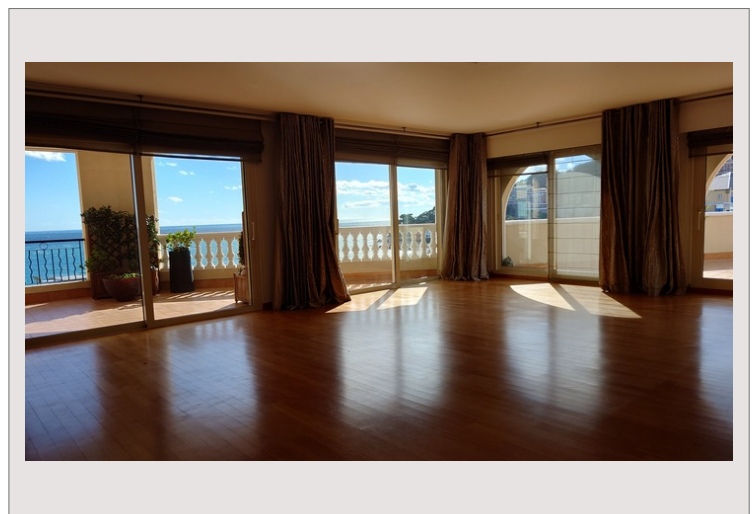

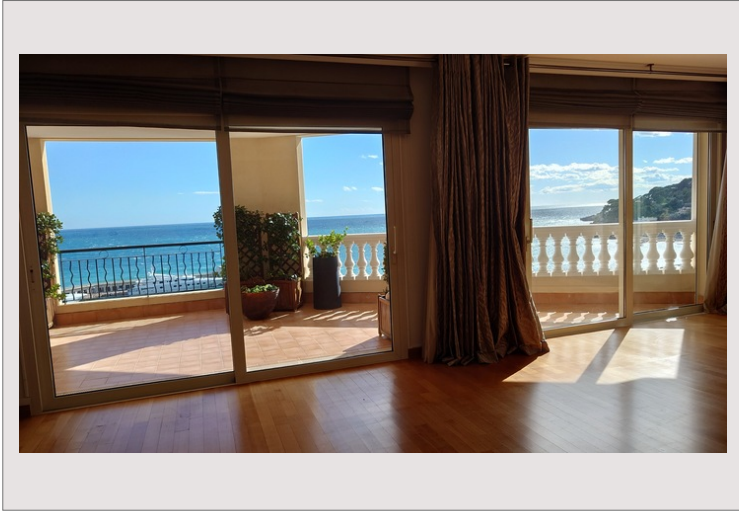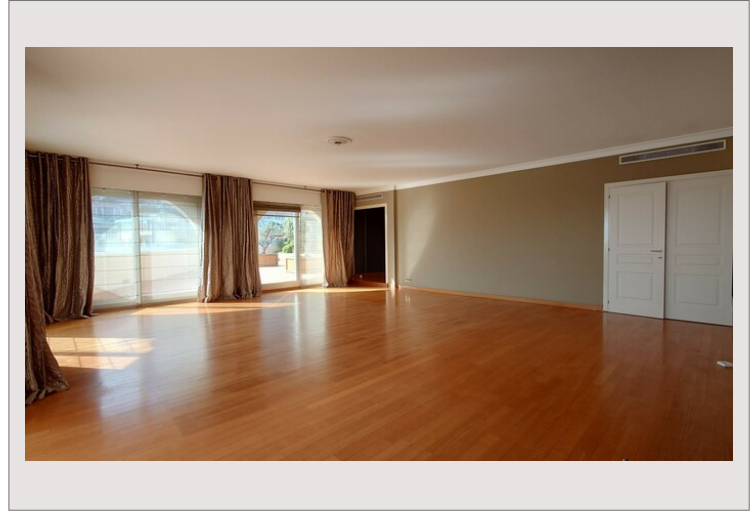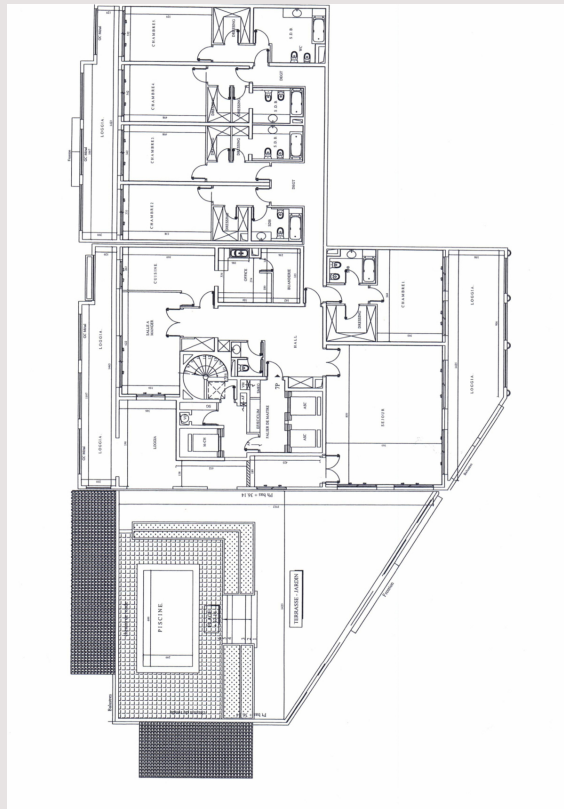

Supplement: mmc7 [file mmc7.pdf]
